# Supplementary material for: Reliable reference for the methane concentrations in Lake Kivu at the beginning of industrial exploitation
Source: Copernicus journal article supplement (doi:10.5194/hess-23-4707-2019), 2019-11-19
Supplement: Supplementary file 1 [file hess-23-4707-2019-supplement.zip]

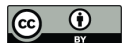

## *Supplement of*

# **Reliable reference for the methane concentrations in Lake Kivu at the beginning of industrial exploitation**

**Bertram Boehrer et al.**

*Correspondence to:* Bertram Boehrer ([bertram.boehrer@ufz.de](mailto:bertram.boehrer@ufz.de))

- [hess-23-4707-2019-supplement-title-page.pdf](#)
- [Kivu\\_20170527\\_1.ctm1143X](#)
- [Kivu\\_20170602\\_1.ctm1143X](#)
- [Kivu\\_20180309\\_1.ctm1143X](#)
- [Kivu\\_20180312\\_2.ctm1143X](#)
- [read.me](#)

The copyright of individual parts of the supplement might differ from the CC BY 4.0 License.
